# Supplementary material for: Gold Nanocolumnar Templates for Effective Chemical Sensing by Surface-Enhanced Raman Scattering
Source: MDPI journal article supplement (doi:10.3390/nano12234157), 2022-11-24
Supplement: s1 [file s1]

## Gold Nanocolumnar Templates for Effective Chemical Sensing by Surface-Enhanced Raman Scattering

Grégory Barbillon<sup>1,\*</sup>, Christophe Humbert<sup>2</sup>, María Ujué González<sup>3</sup>, José Miguel García-Martín<sup>3</sup>

<sup>1</sup>EPF-École d'Ingénieurs, 55 Avenue du Président Wilson, 94230 Cachan, France.

<sup>2</sup>Institut de Chimie Physique, Université Paris-Saclay, CNRS, UMR8000, 91405 Orsay, France.

<sup>3</sup>Instituto de Micro y Nanotecnología, IMN-CNM, CSIC (CEI UAM+CSIC), Isaac Newton 8, 28760, Tres Cantos, Madrid, Spain.

\*Correspondence : gregory.barbillon@epf.fr

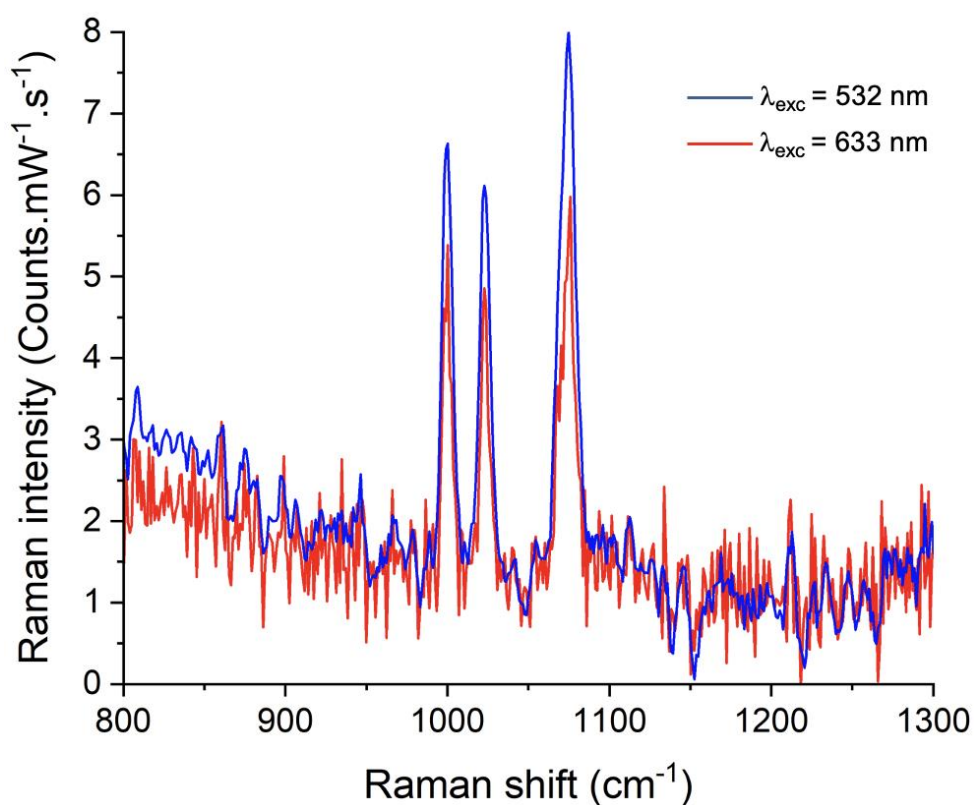

**Figure S1.** Raman spectra of thiophenol molecules at the concentration of 1 M recorded on a glass substrate without any gold nanocolumns at excitation wavelengths of 532 nm (in blue color) and 633 nm (in red color).
